# Supplementary material
Source: publisher figshare collection journal article supplement (https://tandf.figshare.com/ndownloader/files/22135509)
Supplement: Supplementary file 1 [file 22135509]

**Figure 2. Quantitative score (14-item) of adherence to the Mediterranean Diet (16)**

|                                                                                                                                                                  | Frequency <sup>1</sup>     |
|------------------------------------------------------------------------------------------------------------------------------------------------------------------|----------------------------|
| 1. Do you use olive oil as the principal source of fat for cooking?                                                                                              | Yes                        |
| 2. How much olive oil do you consume per day (including that used in frying, salads, meals eaten away from home, etc.)?                                          | $\geq 4$ Tbsp <sup>5</sup> |
| 3. How many servings of vegetables do you consume per day? Count garnish and side servings as 1/2 point; a full serving is 200 g.                                | $\geq 2$                   |
| 4. How many pieces of fruit (including fresh-squeezed juice) do you consume per day?                                                                             | $\geq 3$                   |
| 5. How many servings of red meat, hamburger, or sausages do you consume per day? A full serving is 100–150 g.                                                    | $< 1$                      |
| 6. How many servings (12 g) of butter, margarine, or cream do you consume per day?                                                                               | $< 1$                      |
| 7. How many carbonated and/or sugar-sweetened beverages do you consume per day?                                                                                  | $< 1$                      |
| 8. Do you drink wine? How much do you consume per week?                                                                                                          | $\geq 7$ cups <sup>6</sup> |
| 9. How many servings (150 g) of pulses do you consume per week?                                                                                                  | $\geq 3$                   |
| 10. How many servings of fish/seafood do you consume per week? (100–150 g of fish, 4–5 pieces or 200 g of seafood)                                               | $\geq 3$                   |
| 11. How many times do you consume commercial (not homemade) pastry such as cookies or cake per week?                                                             | $< 2$                      |
| 12. How many times do you consume nuts per week? (1 serving = 30 g)                                                                                              | $\geq 3$                   |
| 13. Do you prefer to eat chicken, turkey or rabbit instead of beef, pork, hamburgers, or sausages?                                                               | Yes                        |
| 14. How many times per week do you consume boiled vegetables, pasta, rice, or other dishes with a sauce of tomato, garlic, onion, or leeks sautéed in olive oil? | $\geq 2$                   |
